# Supplementary material for: Immediate Discharge and Home Treatment With Rivaroxaban of Low‐risk Venous Thromboembolism Diagnosed in Two U.S. Emergency Departments: A One‐year Preplanned Analysis
Source: PubMed Central journal article supplement — Acad Emerg Med. 2015 Jun 25;22(7):788–95. doi: 10.1111/acem.12711 (PMC5034796; doi:10.1111/acem.12711), 2015-06-25
Supplement: ACEM-22-788-s001.pdf [file ACEM-22-788-s001.pdf]

**Data Supplement 1.** Mandatory survey completed by clinicians for emergency patients with venous thromboembolism to be eligible for home treatment with rivaroxaban

Confidential

Page 1 of 2

## Survey

Please complete these questions

Thank you!

Date of diagnosis

(click on the clock icon)

Diagnosis

- Deep venous thrombosis
- Pulmonary embolism

Where is the DVT?

- left leg
  - right leg
  - left arm
  - right arm
  - axillary vein
  - calf vein
  - femoral vein
  - saphenous vein
  - other vein
- (choose all that apply)

Where is the PE?

- Left lung
  - Right lung
- (choose all that apply)

Size of PE

- subsegmental only
  - segmental or multiple segmental
  - lobar or larger
- (Choose the size that fits best)

---

---

**Eligibility criteria for patients without active malignancy--all buttons must be checked**

Age>17

Eligibility criteria

Systolic always>100 mm Hg in absence of history of low blood pressure

No contraindication to anticoagulation treatment (active bleeding or high risk postoperative status, creatinine clearance < 30 ml/min, history of heparin induced thrombocytopenia or warfarin skin necrosis);  
No other medical condition requiring hospital treatment (sepsis, new or decompensated existing organ failure, intractable pain);

Confidential

No social condition requiring hospital treatment (homelessness with history of non-adherence to treatment, suspected neglect or abuse, incarceration, untreated psychosis, severe alcohol or drug dependency);

No coagulopathy or current anticoagulant resulting in an INR>1.7, or thrombocytopenia (platelet count < 50,000/uL);

No need for supplemental oxygen (no respiratory distress and pulse ox always >94%)

Does patient have active cancer?

- True
 False
(Under care of oncologist, or any metastatic cancer)

POMPE-C criteria must be filled out for patients with active cancer (recommended safe value < 6%)
http://www.studymaker.com/projects/pompe/index.php)

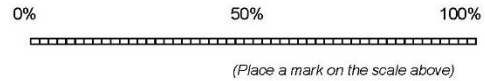

Patient last name:

\_\_\_\_\_

Patient first name

\_\_\_\_\_

Where are you working?

- Methodist
 University
 West
 Wishard

Medical Record Number

\_\_\_\_\_

Accurate phone number for the patient

\_\_\_\_\_

Where do you want the patient to follow-up? Patients follow up at the location they were diagnosed.

- KLOT Clinic Methodist (Second Friday of each month)
 KLOT Clinic Wishard (Fourth Friday each month)
 Patient's own physician

What date do you want the patient to follow up at the Eskenazi 4th Floor Outpatient Clinic? (between 2-5 weeks after today's date)?

- Dec 20, 2013
 Jan 24, 2014
 Feb 28, 2014
 Mar 28, 2014
 Apr 25, 2014
 May 23, 2014
 Jun 27, 2014

What date do you want the patient to follow up at the Methodist EMTC KLOT clinic? (Between 2-5 weeks after today's date)

- Dec 13, 2013
 Jan 10, 2014
 Feb 14, 2014
 Mar 14, 2014
 Apr 11, 2014
 May 9, 2014
 Jun 13, 2014

Please enter your name

\_\_\_\_\_
(last name, first name)
