# Supplementary material for: Immediate Discharge and Home Treatment With Rivaroxaban of Low‐risk Venous Thromboembolism Diagnosed in Two U.S. Emergency Departments: A One‐year Preplanned Analysis
Source: PubMed Central journal article supplement — Acad Emerg Med. 2015 Jun 25;22(7):788–95. doi: 10.1111/acem.12711 (PMC5034796; doi:10.1111/acem.12711), 2015-06-25
Supplement: ACEM-22-788-s002.pdf [file ACEM-22-788-s002.pdf]

## History and Physical for Clinic Follow-up

Patient name: \_\_\_\_\_ Date: \_\_\_\_\_

1. Ensure informed consent and accurate contact information
2. Diagnosis:
3. Subjective:
4. Rivaroxaban compliance
  - a. BID or QD
  - b. Pill shape (round or triangles)
  - c. Any missed doses?    Y   N
  - d. Time of day taking pill(s):
  - e. Pill count correct?    Y   N
  - f. Pharmacy: \_\_\_\_\_
  - g. Problems getting drug   Y   N
5. Symptoms of VTE recurrence
  - a. Shortness of breath    Y   N
  - b. Chest pain                Y   N
  - c. Leg swelling              Y   N
6. Signs of bleeding
  - a. Nose                        Y   N
  - b. Gums                        Y   N
  - c. Urine                        Y   N
  - d. Stool                        Y   N
  - e. Skin                         Y   N
7. Sites of new pain since starting medicine \_\_\_\_\_
8. New symptoms since starting medicine \_\_\_\_\_
9. Physical exam
  - a. General/Vital signs
  - b. Skin
  - c. Mouth
  - d. Heart sounds
  - e. Lung sounds
  - f. Musculoskeletal
  - g. Villalta Score
10. Surveys
  - a. SF-36
  - b. Kubo NYHA
  - c. VEINES QOL
11. Assessment/Plan
12. Instructions
  - a. Schedule six month return in advance of stopping meds
  - b. Call us if you think you are bleeding or have a new clot
  - c. Do not stop medicine unless a doctor says to
  - d. Ensure they have Xarelto patient information packet
  - e. Contraception for women of child bearing age
  - f. Decision to continue or stop meds will be made at six month visit
13. Any other points the patient wishes to make:
