# Supplementary material for: Immediate Discharge and Home Treatment With Rivaroxaban of Low‐risk Venous Thromboembolism Diagnosed in Two U.S. Emergency Departments: A One‐year Preplanned Analysis
Source: PubMed Central journal article supplement — Acad Emerg Med. 2015 Jun 25;22(7):788–95. doi: 10.1111/acem.12711 (PMC5034796; doi:10.1111/acem.12711), 2015-06-25
Supplement: ACEM-22-788-s003.pdf [file ACEM-22-788-s003.pdf]

**Data Supplement 3. Introduction of protocol to ED staff at Wishard and Methodist hospitals in Indianapolis, IN, issued in February 2013.**

**KLOT CLINIC PROTOCOL FOR OUTPATIENT DVT/PE TREATMENT**

**PROTOCOL**

1. Please have results of complete blood count and basic metabolic package.
2. Clinician must click this link and enter the patient in the outpatient VTE database by completing all mandatory fields to ensure that the patient meets eligibility and can be contacted for follow-up: <https://redcap.uits.iu.edu/surveys/?s=IAFz3W>.
3. Order enoxaparin 1 mg/kg subcutaneous now—give a dose before discharge.
4. Order Xarelto®, 15 mg orally now—give a dose before discharge.
5. Write Rx: Xarelto® 15 mg BID for 21 days, then 20 mg once daily for 30 days.
6. Give patient a KLOT clinic patient handout (located in work room above the sink as their discharge instructions).
7. Patient must follow-up at the next KLOT clinic (KLine Outpatient Treatment clinic).  
**THIS IS HELD ON THE FOURTH FRIDAY OF EACH MONTH AT 9AM IN  
SPECIAL MEDICINE CLINIC IN REGENSTRIEF.**
